# Supplementary material
Source: PubMed Central journal article supplement (PMC1892633)
Supplement: NIHMS21399-supplement-SI.pdf [file NIHMS21399-supplement-SI.pdf]

## Supporting Information

### Captions for Supporting Information Figures

Figure S1. Formal diagram of the porphyrinato core of [Fe(Deut)(NO)] displaying the perpendicular displacements (in units of 0.01 Å) of the core atoms from the 24-atom mean porphyrin plane. Pyrrole rings are designated I to IV based upon a standard nomenclature. Positive displacements are towards the nitrosyl coordinated face of the porphyrin. The projection of the nitrosyl ligand is shown.

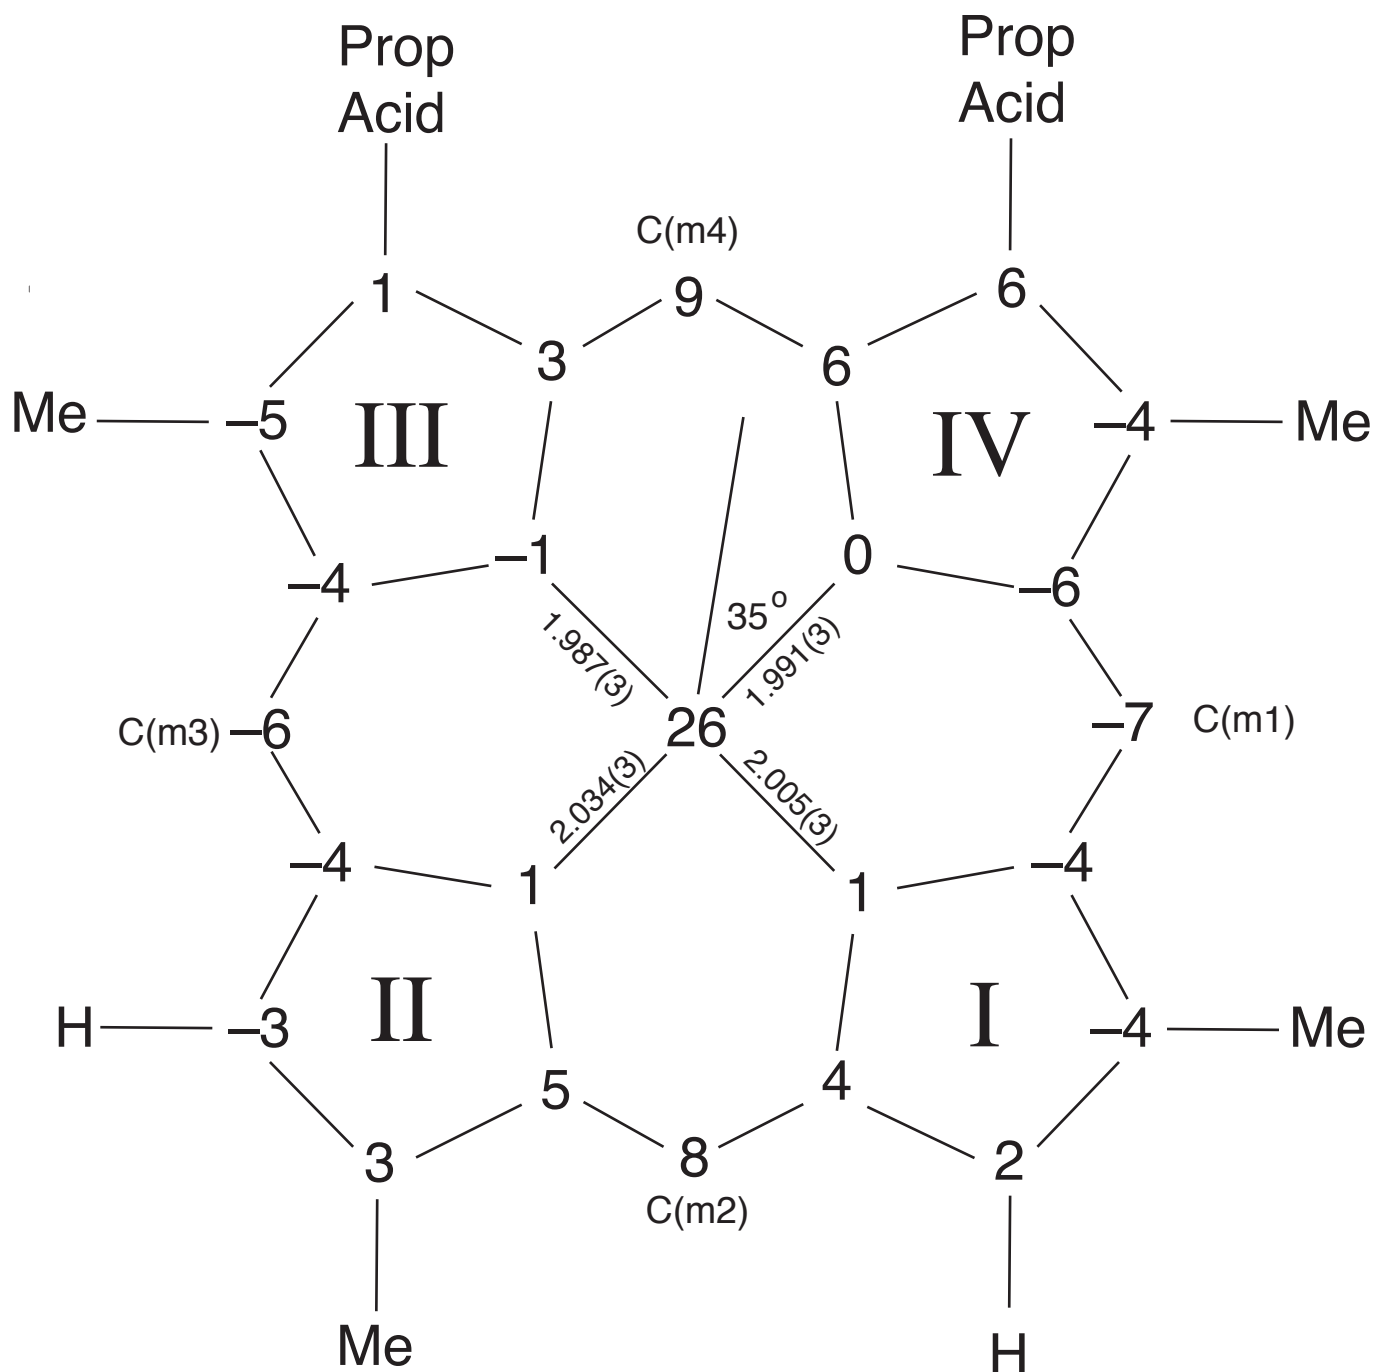

**Table S1A. Summary of Nitrosyl Geometry in Five-coordinate Heme Protein Derivatives.**

| Complex                              | PDB Code | Resolution <sup>a</sup> | Fe-N <sub>NO</sub> <sup>a</sup> | ∠FeNO <sup>b</sup> | N-O <sup>a</sup>  | ϕ <sup>b,c</sup> | ϕ* <sup>b,d</sup> | ref |
|--------------------------------------|----------|-------------------------|---------------------------------|--------------------|-------------------|------------------|-------------------|-----|
| (T243N-P450nor)NO                    | 1F25     | 1.4                     | 1.9 <sup>e</sup>                | 131 <sup>e</sup>   | 1.45 <sup>e</sup> | 41               | -49               | 18  |
| (cyt c')NO ( <b>1</b> ) <sup>f</sup> | 1E85     | 1.35                    | 2.0                             | 124                | 1.16 <sup>e</sup> | 24               | -114              | 19  |
| (NP1)NO ( <b>I</b> ) <sup>g</sup>    | 4NP1     | 2.3                     | NA                              | 125                | NA                | 44               | 134               | 20  |
| (NP1)NO ( <b>II</b> ) <sup>h</sup>   | 4NP1     | 2.3                     | NA                              | 135                | NA                | 45               | 135               | 20  |
| (eNOS)NO(+4HB) <sup>i,j</sup>        | 1FOP     | 2.30                    | 1.80                            | 160                | 1.15              | 44               | 136               | 21  |
| (eNOS)NO(-4HB) <sup>i,k</sup>        | 1FOO     | 2.00                    | 1.80                            | 160                | 1.14              | 34               | 146               | 21  |
| (α-Hb)NO                             | ---      | 2.8                     | 1.74                            | 145                | 1.1               | 25               | 245               | 22  |
| (NP4)NO ( <b>I</b> ) <sup>l</sup>    | 1ERX     | 1.4                     | 2.0                             | 110                | NA                | 1                | 269               | 23  |
| (T243A-P450nor)NO                    | 1F24     | 1.4                     | 2.1 <sup>e</sup>                | 120 <sup>e</sup>   | 1.42 <sup>e</sup> | 14               | -284              | 18  |
| (T243V-P450nor)NO                    | 1F26     | 1.4                     | 2.0 <sup>e</sup>                | 119 <sup>e</sup>   | 1.36 <sup>e</sup> | 16               | -286              | 18  |
| (cyt c')NO ( <b>2</b> ) <sup>m</sup> | 1E85     | 1.35                    | 2.0                             | 132                | 1.17 <sup>e</sup> | 38               | -322              | 19  |
| (α-T-Hb <sub>A</sub> )NO             | ---      | 2.2                     | 1.74                            | 150                | 1.13              | NA               | NA                | 24  |

**Table S1B. Summary of Nitrosyl Geometry in Six-coordinate Protein Derivatives.**

| Complex                           | PDB Code             | Resolution <sup>a</sup> | Fe-N <sub>2</sub> O <sup>a</sup> | ∠FeNO <sup>b</sup> | N-O <sup>a</sup>   | Fe-L <sup>a</sup> | $\phi^{b,c}$ | $\phi^{*,b,d}$ | ref |
|-----------------------------------|----------------------|-------------------------|----------------------------------|--------------------|--------------------|-------------------|--------------|----------------|-----|
| ( <i>cd1</i> -NIR( <i>tp</i> ))NO | 1AOM                 | 1.8                     | 2.0                              | 131                | 1.35 <sup>e</sup>  | 1.99 <sup>e</sup> | 30           | 120            | 25  |
| (SiRHP)NO                         | 6GEP                 | 1.80                    | 1.76                             | 125                | 1.17 <sup>e</sup>  | 2.65 <sup>n</sup> | 40           | -140           | 26  |
| (hh-Mb)NO                         | 1NPF                 | 1.90                    | 2.03                             | 147                | 1.14               | 2.11              | ~10          | ~-190          | 27  |
| (sw-L29F-Mb)NO                    | 1JDO                 | 1.7                     | 1.86 <sup>e</sup>                | 130                | 1.14 <sup>e</sup>  | NA                | 11           | -191           | 28  |
| (sw-Mb)NO                         | 1HJT                 | 1.7                     | 1.89                             | 112                | 1.15               | 2.18              | 25           | -205           | 29  |
| ( $\alpha$ -SNO-nitrosylHbA)NO    | 1BUW                 | 1.8                     | 1.75                             | 131                | 1.13               | 2.28              | 44           | -224           | 30  |
| ( $\beta$ -SNO-nitrosylHbA)NO     | 1BUW                 | 1.8                     | 1.74                             | 123                | 1.11               | 2.28              | 34           | -236           | 30  |
| ( $\beta$ -Hb)NO <sup>o</sup>     | —                    | 2.8                     | 1.74                             | 145                | 1.1                | NA                | 15           | 255            | 22  |
| (fungal-NOR)NO                    | 1CL6                 | 1.7                     | 1.63                             | 161                | 1.16               | 2.31 <sup>n</sup> | 28           | -298           | 31  |
| (S286T-fungal-NOR)NO              | 1CMJ                 | 1.7                     | 1.65                             | 162                | 1.13               | 2.33 <sup>n</sup> | 29           | -299           | 31  |
| (S286V-fungal-NOR)NO              | 1CMN                 | 1.7                     | 1.62                             | 162                | 1.13               | 2.37 <sup>n</sup> | 45           | -315           | 31  |
| (SHP)NO                           | 1DW2                 | 2.2                     | 1.8                              | 112                | 1.36 <sup>e</sup>  | 2.16 <sup>e</sup> | 45           | 315            | 32  |
| ( <i>cd1</i> -NIR( <i>pa</i> ))NO | 1NNO                 | 2.65                    | 1.8                              | 135                | 1.15               | 1.99 <sup>e</sup> | 26           | 334            | 33  |
| (lupin-Lb <sup>II</sup> )NO       | 1GDL                 | 1.8                     | 1.72                             | 147                | 1.355 <sup>e</sup> | 2.20              | 2            | 358            | 34  |
| ( $\beta$ -T-Hb <sub>A</sub> )NO  | —                    | 2.2                     | 1.74                             | 155                | 1.12               | 2.30              | NA           | NA             | 24  |
| (CCP)NO ( <b>1</b> ) <sup>p</sup> | 2CYP                 | 1.85                    | 1.82                             | 135                | NA                 | 2.04              | NA           | NA             | 35  |
| (CCP)NO ( <b>2</b> ) <sup>q</sup> | 2CYP                 | 1.85                    | 1.82                             | 125                | NA                 | 2.04              | NA           | NA             | 35  |
| (hh-Mb)NO                         | MS-XAFS <sup>r</sup> | NA                      | 1.76                             | 150                | 1.12               | 2.05              | NA           | NA             | 36  |
| (soybean-Lb <sup>II</sup> )NO     | MS-XAFS <sup>r</sup> | NA                      | 1.77                             | 147                | 1.12               | 1.98              | NA           | NA             | 37  |

<sup>a</sup> Value in angstroms. <sup>b</sup> Value in degrees. <sup>c</sup> dihedral angle between Fe–N–O plane and closest Fe–N<sub>p</sub> vector. <sup>d</sup> Signed torsion angle for the unit O–N–Fe–N<sub>p</sub> of pyrrole ring IV. Positive values refer to NO coordinated on the “top” of the porphyrin and represent a clockwise rotation about the N(NO)–Fe axis between the O–N–Fe and N–Fe–N<sub>p</sub> planes whilst negative values represent NO coordinated on the “bottom” and a counterclockwise rotation is required. Both sets of values are comparable, for example  $\phi^*$  angles of 90 and  $-90^\circ$  representing two NOs coordinated one each face of the porphyrin and orientated directly above each other. Absolute  $\phi^*$  values of 270, 180 and  $90^\circ$  result in NO orientations coincident with the Fe–N<sub>p</sub> bonds of pyrrole rings I, II and III respectively. <sup>e</sup> Value not reported in original literature report. Taken from PDB coordinates. <sup>f</sup> Nitrosyl conformer 1. <sup>g</sup> 2 molecules in asymmetric unit, molecule I. <sup>h</sup> 2 molecules in asymmetric unit, molecule II. <sup>i</sup> Values reported are averaged for both subunits. <sup>j</sup> Cofactor tetrahydrobiopterin present. <sup>k</sup> Cofactor tetrahydrobiopterin absent. <sup>l</sup> 2 orientations of NO observed, orientation I. <sup>m</sup> Nitrosyl conformer 2. <sup>n</sup> Fe–S bond. <sup>o</sup> Differs from  $\alpha$  form by orientation of NO with respect to the heme and coordination number. <sup>p</sup> Disordered oxygen, position 1. <sup>q</sup> Disordered oxygen, position 2. <sup>r</sup> Structure determined by multiple scattering XAFS.

**Abbreviations:**

|                                          |                                                                                           |
|------------------------------------------|-------------------------------------------------------------------------------------------|
| CCP                                      | Yeast cytochrome <i>c</i> peroxidase.                                                     |
| <i>cd</i> <sub>1</sub> -NIR( <i>pa</i> ) | Cytochrome <i>cd</i> <sub>1</sub> nitrite reductase from <i>Pseudomonas aeruginosa</i> .  |
| <i>cd</i> <sub>1</sub> -NIR( <i>tp</i> ) | Cytochrome <i>cd</i> <sub>1</sub> nitrite reductase from <i>Thiosphaera pantotropha</i> . |
| cyt <i>c'</i>                            | Cytochrome <i>c'</i> from <i>Alcaligenes xylosoxidans</i> .                               |
| 4HB                                      | Co-factor tetrahydrobiopterin.                                                            |
| $\alpha$ -Hb                             | Nitrosylated horse hemoglobin, $\alpha$ subunit.                                          |
| $\beta$ -Hb                              | Nitrosylated horse hemoglobin, $\beta$ subunit.                                           |
| $\alpha$ -T-Hb <sub>A</sub>              | T-state human hemoglobin A, $\alpha$ subunit.                                             |
| $\alpha$ -T-Hb <sub>A</sub>              | T-state human hemoglobin A, $\beta$ subunit.                                              |
| Lupin-Lb <sup>II</sup>                   | Lupin ferrous leghemoglobin.                                                              |
| fungal-NOR                               | Fungal nitric oxide reductase                                                             |
| S286T-fungal-NOR                         | Threonine mutant of fungal nitric oxide reductase                                         |
| S286V-fungal-NOR                         | Valine mutant of fungal nitric oxide reductase                                            |
| hh-Mb                                    | Horse Heart Myoglobin.                                                                    |
| sw-Mb                                    | Sperm Whale Myoglobin.                                                                    |
| sw-L29F-Mb                               | Mutant (L29F) Sperm Whale Myoglobin.                                                      |
| NOS                                      | Bovine endothelial nitric oxide synthase.                                                 |
| NP1                                      | Nitrophorin 1 from <i>Rhodnius prolixus</i> saliva.                                       |
| NP4                                      | Nitrophorin 4 from <i>Rhodnius prolixus</i> saliva.                                       |
| SHP                                      | Sphaeroides Heme Protein from <i>Rhodobacter sphaeroides</i> .                            |
| SiRHP                                    | Sulfite reductase heme protein from <i>Escherichia coli</i> .                             |
| $\alpha$ -SNO-nitrosylHbA                | S-Nitroso form of human hemoglobin, alpha subunit.                                        |
| $\beta$ -SNO-nitrosylHbA                 | S-Nitroso form of human hemoglobin, beta subunit.                                         |
| soybean-Lb <sup>II</sup>                 | Soybean ferrous leghemoglobin A.                                                          |
| soybean-Lb <sup>III</sup>                | Soybean ferric leghemoglobin A.                                                           |
| T243A-P450nor                            | Mutant (T243A) Cytochrome P450nor (fungal nitric oxide reductase).                        |

T243N-P450nor      Mutant (T243N) Cytochrome P450nor (fungal nitric oxide reductase).  
T243V-P450nor      Mutant (T243V) Cytochrome P450nor (fungal nitric oxide reductase).

## References and Notes

- (18) Obayashi, E.; Shimizu, H.; Park, S.-Y.; Shoun, H.; Shiro, Y. *J. Inorg. Biochem.* **2000**, *82*, 103.
- (19) Lawson, D. M.; Stevenson, C. E. M.; Andrew, C. R.; Eady, R. R. *EMBO J.*, **2000**, *19*, 5661.
- (20) Ding, X. A.; Weichsel, A.; Anderson, J. F.; Shokhireva, T. Kh.; Balfour, C.; Pierik, A. J.; Averill, B. A.; Montfort, W. R.; Walker, F. A. *J. Am. Chem. Soc.* **1999**, *121*, 128.
- (21) Li, H.; Raman, C. S.; Martasek, P.; Masters, B. S. S.; Poulos, T. L. *Biochemistry* **2001**, *81*, 40.
- (22) Deatherage, J. F.; Moffat, K. *J. Mol. Biol.* **1979**, *134*, 401.
- (23) Weischel, A.; Anderson J. F.; Roberts, S. A.; Montfort, W. R. *Nat. Struct. Biol.* **2000**, *7*, 551.
- (24) Chan, N.-L. Ph.D. Dissertation, University of Iowa, Iowa City, IA, 1998.
- (25) (a) Williams, P. A.; Fülöp, V.; Garman, E. G.; Saunders, N. F. W.; Ferguson, S. J.; Hajdu, J. *Nature*(London), **1997**, *389*, 406. (b) Fülöp, V.; Moir, J. W. B.; Ferguson, S. J.; Hajdu, J. *Cell* **1995**, *81*, 369.
- (26) Crane, B. R.; Siegel, L. M.; Getzoff, E. D. *Biochemistry* **1997**, *36*, 12120.
- (27) Copeland, D. M.; West, A. H.; Richter-Addo, G. B. *Proteins*, **2003**, In Press.
- (28) Brucker, E. A.; Phillips, G. N., Jr., unpublished results reported in reference 29.
- (29) Brucker, E. A.; Olson, J. S.; Ikeda-Saito, M.; Phillips, G. N., Jr. *Proteins: Struct., Funct., Genet.* **1998**, *30*, 352.
- (30) Chan, N.-L.; Rogers, P. H.; Arnone, A. *Biochemistry* **1998**, *37*, 16459.
- (31) Shimizu, H.; Obayashi, E.; Gomi, Y.; Arakawa, H.; Park, S.-Y.; Nakamura, H.; Adachi, S.-I.; Shoun, H.; Shiro, Y. *J. Biol. Chem.* **2000**, *275*, 4816.
- (32) Leys, D.; Backers, K.; Meyer, T. E.; Hagen, W. R.; Cusanovich, M. A.; Van Beeumen, J. *J. J. Biol. Chem.* **2000**, *275*, 16050.
- (33) Nurizzo, D.; Cutruzzola, F.; Arese, M.; Bourgeois, D.; Brunori, M.; Cambillau, C.; Tegoni, M. *Biochemistry* **1998**, *37*, 13987.



- (34) Harutyunyan, E. H.; Safonova, T. N.; Kuranova, I. P.; Popov, A. N.; Teplyakov, A. V.; Oblomova, G. V.; Vainshtein, B. K.; Dodson, G. G.; Wilson, J. C. *J. Mol. Biol.* **1996**, *264*, 152.
- (35) Edwards, S. L.; Poulos, T. L. *J. Biol. Chem.* **1990**, *265*, 2588.
- (36) Rich, A. M.; Armstrong, R. S.; Ellis, P. J.; Lay, P. A. *J. Am. Chem. Soc.* **1998**, *120*, 10827.
- (37) Rich, A. M.; Ellis, P. J.; Tennant, L.; Wright, P. E.; Armstrong, R. S.; Lay, P. A. *Biochemistry* **1999**, *38*, 16491.

**Table S2.** Complete Crystallographic Details for [Fe(deut)(NO)]

|                                                              |                                                                   |
|--------------------------------------------------------------|-------------------------------------------------------------------|
| formula                                                      | C <sub>32</sub> H <sub>32</sub> FeN <sub>5</sub> O <sub>5</sub>   |
| FW, amu                                                      | 622.48                                                            |
| <i>a</i> , Å                                                 | 11.3518(14)                                                       |
| <i>b</i> , Å                                                 | 11.6492(15)                                                       |
| <i>c</i> , Å                                                 | 12.0065(15)                                                       |
| $\alpha$ , deg                                               | 78.915(2)                                                         |
| $\beta$ , deg                                                | 77.590(2)                                                         |
| $\gamma$ , deg                                               | 64.663(2)                                                         |
| <i>V</i> , Å <sup>3</sup>                                    | 1392.4(3)                                                         |
| space group                                                  | <i>P</i> $\bar{1}$                                                |
| <i>Z</i>                                                     | 2                                                                 |
| D <sub>c</sub> , g/cm <sup>3</sup>                           | 1.485                                                             |
| F(000)                                                       | 650                                                               |
| $\mu$ , mm <sup>-1</sup>                                     | 0.594                                                             |
| crystal dimensions, mm                                       | 0.28 × 0.24 × 0.21                                                |
| radiation                                                    | MoK $\alpha$ , $\bar{\lambda}$ = 0.71073 Å                        |
| temperature, K                                               | 100(2)                                                            |
| diffractometer                                               | Bruker Apex CCD                                                   |
| $\theta$ range for collected data, deg                       | 1.95–25.04                                                        |
| index range                                                  | –13 ≤ <i>h</i> ≤ 13<br>–13 ≤ <i>k</i> ≤ 13<br>–14 ≤ <i>l</i> ≤ 14 |
| total data collected                                         | 11640                                                             |
| absorption correction                                        | Empirical                                                         |
| relative transmission coefficients (I)                       | 1.00 and 0.759                                                    |
| unique data                                                  | 4918 ( <i>R</i> <sub>int</sub> = 0.0394)                          |
| refinement method                                            | Full-matrix least-squares on F <sup>2</sup>                       |
| data/restraints/parameters                                   | 4918/0/398                                                        |
| goodness-of-fit (pased on <i>F</i> <sup>2</sup> )            | 1.050                                                             |
| final <i>R</i> indices [ <i>I</i> > 2 $\sigma$ ( <i>I</i> )] | <i>R</i> <sub>1</sub> = 0.0594, <i>wR</i> <sub>2</sub> = 0.1460   |
| final <i>R</i> indices (all data)                            | <i>R</i> <sub>1</sub> = 0.0738, <i>wR</i> <sub>2</sub> = 0.1543   |

**Table S3.** Atomic Coordinates and Equivalent Isotropic Displacement Parameters ( $\text{\AA}^2$ ) for  $[\text{Fe}(\text{deut})(\text{NO})]^a$

| atom  | $x$        | $y$        | $z$        | $U(\text{eq})$ |
|-------|------------|------------|------------|----------------|
| Fe(1) | 0.37474(5) | 0.45148(5) | 1.41143(4) | 0.0218(2)      |
| N(1)  | 0.2074(3)  | 0.6019(3)  | 1.3860(3)  | 0.0222(7)      |
| N(2)  | 0.2976(3)  | 0.4205(3)  | 1.5752(3)  | 0.0263(7)      |
| N(3)  | 0.5553(3)  | 0.3311(3)  | 1.4538(3)  | 0.0291(8)      |
| N(4)  | 0.4650(3)  | 0.5118(3)  | 1.2666(3)  | 0.0219(7)      |
| N(5)  | 0.3344(3)  | 0.3549(3)  | 1.3482(3)  | 0.0233(7)      |
| O(5)  | 0.2805(3)  | 0.3547(3)  | 1.2739(2)  | 0.0301(6)      |
| C(a1) | 0.1803(3)  | 0.6790(4)  | 1.2844(3)  | 0.0239(8)      |
| C(a2) | 0.0887(4)  | 0.6368(4)  | 1.4597(3)  | 0.0251(8)      |
| C(a3) | 0.1687(4)  | 0.4781(4)  | 1.6236(3)  | 0.0288(9)      |
| C(a4) | 0.3604(4)  | 0.3232(4)  | 1.6582(3)  | 0.0297(9)      |
| C(a5) | 0.5827(4)  | 0.2465(4)  | 1.5521(4)  | 0.0308(9)      |
| C(a6) | 0.6754(4)  | 0.3030(4)  | 1.3833(4)  | 0.0287(9)      |
| C(a7) | 0.5977(4)  | 0.4584(4)  | 1.2205(3)  | 0.0251(8)      |
| C(a8) | 0.4060(4)  | 0.6021(3)  | 1.1810(3)  | 0.0223(8)      |
| C(b1) | 0.0407(4)  | 0.7636(4)  | 1.2936(4)  | 0.0307(9)      |
| C(b2) | -0.0136(4) | 0.7388(4)  | 1.4027(4)  | 0.0297(9)      |
| C(b3) | 0.1495(4)  | 0.4150(4)  | 1.7409(3)  | 0.0298(9)      |
| C(b4) | 0.2667(4)  | 0.3218(4)  | 1.7584(4)  | 0.0331(9)      |
| C(b5) | 0.7227(4)  | 0.1650(4)  | 1.5397(4)  | 0.0325(10)     |
| C(b6) | 0.7791(4)  | 0.1992(4)  | 1.4394(4)  | 0.0319(9)      |
| C(b7) | 0.6199(4)  | 0.5180(4)  | 1.1066(3)  | 0.0284(9)      |
| C(b8) | 0.5009(4)  | 0.6069(4)  | 1.0806(3)  | 0.0244(8)      |
| C(m1) | 0.0714(4)  | 0.5775(4)  | 1.5708(3)  | 0.0316(9)      |
| C(m2) | 0.4919(4)  | 0.2426(4)  | 1.6448(4)  | 0.0313(9)      |
| C(m3) | 0.6948(4)  | 0.3618(4)  | 1.2757(4)  | 0.0305(9)      |
| C(m4) | 0.2726(4)  | 0.6785(3)  | 1.1880(3)  | 0.0232(8)      |
| C(1)  | 0.0211(4)  | 0.4557(4)  | 1.8195(4)  | 0.0368(10)     |
| C(2)  | 0.7860(4)  | 0.0615(4)  | 1.6335(4)  | 0.0397(10)     |
| C(3)  | 0.7510(4)  | 0.4840(5)  | 1.0299(4)  | 0.0372(10)     |
| C(4)  | 0.4726(4)  | 0.6947(4)  | 0.9713(3)  | 0.0288(9)      |
| C(5)  | 0.4867(5)  | 0.8189(4)  | 0.9727(3)  | 0.0352(10)     |
| C(6)  | 0.4867(4)  | 0.8996(4)  | 0.8597(4)  | 0.0311(9)      |
| O(1)  | 0.4338(3)  | 0.8720(3)  | 0.7849(2)  | 0.0332(7)      |

**Table S3.** Continued

| atom  | <i>x</i>   | <i>y</i>  | <i>z</i>  | <i>U</i> (eq) |
|-------|------------|-----------|-----------|---------------|
| C(7)  | 0.4401(5)  | 0.9398(4) | 0.6708(4) | 0.0431(12)    |
| O(2)  | 0.5326(4)  | 0.9790(3) | 0.8360(3) | 0.0498(9)     |
| C(8)  | −0.0297(4) | 0.8516(4) | 1.1970(4) | 0.0382(10)    |
| C(9)  | −0.0603(4) | 0.9921(4) | 1.1948(4) | 0.0382(10)    |
| C(10) | 0.0527(5)  | 1.0286(4) | 1.1360(4) | 0.0399(11)    |
| O(3)  | 0.0431(4)  | 1.1349(3) | 1.1708(4) | 0.0648(11)    |
| C(11) | 0.1455(7)  | 1.1774(6) | 1.1141(8) | 0.088(2)      |
| O(4)  | 0.1413(3)  | 0.9719(3) | 1.0653(3) | 0.0505(9)     |
| C(12) | −0.1550(4) | 0.8011(4) | 1.4582(4) | 0.0364(10)    |

<sup>a</sup>*U*(eq) is defined as one third of the trace of the orthogonalized  $\mathbf{U}_{ij}$  tensor. The estimated standard deviations of the least significant digits are given in parentheses.

**Table S4.** Bond Lengths for [Fe(deut)(NO)]<sup>a</sup>

| bond        | length (Å) | bond        | length (Å) |
|-------------|------------|-------------|------------|
| Fe(1)–N(5)  | 1.723(3)   | C(a7)–C(m3) | 1.373(6)   |
| Fe(1)–N(4)  | 1.987(3)   | C(a7)–C(b7) | 1.433(6)   |
| Fe(1)–N(1)  | 1.992(3)   | C(a8)–C(m4) | 1.383(5)   |
| Fe(1)–N(2)  | 2.005(3)   | C(a8)–C(b8) | 1.443(5)   |
| Fe(1)–N(3)  | 2.035(3)   | C(b1)–C(b2) | 1.356(6)   |
| N(1)–C(a1)  | 1.375(5)   | C(b1)–C(8)  | 1.509(6)   |
| N(1)–C(a2)  | 1.385(5)   | C(b2)–C(12) | 1.509(5)   |
| N(2)–C(a3)  | 1.369(5)   | C(b3)–C(b4) | 1.338(6)   |
| N(2)–C(a4)  | 1.402(5)   | C(b3)–C(1)  | 1.493(6)   |
| N(3)–C(a6)  | 1.382(5)   | C(b5)–C(b6) | 1.312(6)   |
| N(3)–C(a5)  | 1.383(5)   | C(b5)–C(2)  | 1.524(6)   |
| N(4)–C(a8)  | 1.374(5)   | C(b7)–C(b8) | 1.361(6)   |
| N(4)–C(a7)  | 1.391(5)   | C(b7)–C(3)  | 1.505(5)   |
| N(5)–O(5)   | 1.187(4)   | C(b8)–C(4)  | 1.502(5)   |
| C(a1)–C(m4) | 1.383(5)   | C(4)–C(5)   | 1.526(5)   |
| C(a1)–C(b1) | 1.458(5)   | C(5)–C(6)   | 1.495(6)   |
| C(a2)–C(m1) | 1.395(5)   | C(6)–O(2)   | 1.206(5)   |
| C(a2)–C(b2) | 1.442(6)   | C(6)–O(1)   | 1.333(5)   |
| C(a3)–C(m1) | 1.373(6)   | O(1)–C(7)   | 1.448(5)   |
| C(a3)–C(b3) | 1.476(5)   | C(8)–C(9)   | 1.517(6)   |
| C(a4)–C(m2) | 1.374(6)   | C(9)–C(10)  | 1.513(6)   |
| C(a4)–C(b4) | 1.428(6)   | C(10)–O(4)  | 1.204(6)   |
| C(a5)–C(m2) | 1.353(6)   | C(10)–O(3)  | 1.335(6)   |
| C(a5)–C(b5) | 1.453(6)   | O(3)–C(11)  | 1.444(7)   |
| C(a6)–C(m3) | 1.362(6)   |             |            |
| C(a6)–C(b6) | 1.453(6)   |             |            |

<sup>a</sup>The estimated standard deviations of the least significant digits are given in parentheses.

**Table S5.** Bond Angles for [Fe(deut)(NO)]<sup>a</sup>

| angle             | degree     | angle             | degree   |
|-------------------|------------|-------------------|----------|
| N(5)–Fe(1)–N(4)   | 94.92(13)  | C(m3)–C(a7)–C(b7) | 124.3(4) |
| N(5)–Fe(1)–N(1)   | 92.47(14)  | N(4)–C(a7)–C(b7)  | 110.6(3) |
| N(4)–Fe(1)–N(1)   | 89.60(12)  | N(4)–C(a8)–C(m4)  | 125.0(3) |
| N(5)–Fe(1)–N(2)   | 100.29(13) | N(4)–C(a8)–C(b8)  | 111.5(3) |
| N(4)–Fe(1)–N(2)   | 164.79(12) | C(m4)–C(a8)–C(b8) | 123.5(3) |
| N(1)–Fe(1)–N(2)   | 89.92(13)  | C(b2)–C(b1)–C(a1) | 106.3(4) |
| N(5)–Fe(1)–N(3)   | 102.33(14) | C(b2)–C(b1)–C(8)  | 127.4(4) |
| N(4)–Fe(1)–N(3)   | 88.34(13)  | C(a1)–C(b1)–C(8)  | 126.1(4) |
| N(1)–Fe(1)–N(3)   | 165.17(12) | C(b1)–C(b2)–C(a2) | 107.6(3) |
| N(2)–Fe(1)–N(3)   | 88.25(14)  | C(b1)–C(b2)–C(12) | 128.2(4) |
| C(a1)–N(1)–C(a2)  | 105.8(3)   | C(a2)–C(b2)–C(12) | 124.1(4) |
| C(a1)–N(1)–Fe(1)  | 126.3(2)   | C(b4)–C(b3)–C(a3) | 106.4(4) |
| C(a2)–N(1)–Fe(1)  | 127.0(3)   | C(b4)–C(b3)–C(1)  | 129.9(4) |
| C(a3)–N(2)–C(a4)  | 106.1(3)   | C(a3)–C(b3)–C(1)  | 123.7(4) |
| C(a3)–N(2)–Fe(1)  | 126.7(3)   | C(b3)–C(b4)–C(a4) | 108.8(4) |
| C(a4)–N(2)–Fe(1)  | 126.6(3)   | C(b6)–C(b5)–C(a5) | 108.6(4) |
| C(a6)–N(3)–C(a5)  | 105.0(3)   | C(b6)–C(b5)–C(2)  | 128.7(4) |
| C(a6)–N(3)–Fe(1)  | 127.0(3)   | C(a5)–C(b5)–C(2)  | 122.7(4) |
| C(a5)–N(3)–Fe(1)  | 127.4(3)   | C(b5)–C(b6)–C(a6) | 106.8(4) |
| C(a8)–N(4)–C(a7)  | 104.6(3)   | C(b8)–C(b7)–C(a7) | 107.4(3) |
| C(a8)–N(4)–Fe(1)  | 126.7(2)   | C(b8)–C(b7)–C(3)  | 127.1(4) |
| C(a7)–N(4)–Fe(1)  | 127.9(3)   | C(a7)–C(b7)–C(3)  | 125.5(4) |
| O(5)–N(5)–Fe(1)   | 143.1(3)   | C(b7)–C(b8)–C(a8) | 106.0(3) |
| N(1)–C(a1)–C(m4)  | 125.0(3)   | C(b7)–C(b8)–C(4)  | 127.6(3) |
| N(1)–C(a1)–C(b1)  | 110.3(3)   | C(a8)–C(b8)–C(4)  | 126.4(4) |
| C(m4)–C(a1)–C(b1) | 124.7(4)   | C(a3)–C(m1)–C(a2) | 125.3(4) |
| N(1)–C(a2)–C(m1)  | 124.4(4)   | C(a5)–C(m2)–C(a4) | 126.1(4) |
| N(1)–C(a2)–C(b2)  | 109.9(3)   | C(a6)–C(m3)–C(a7) | 125.1(4) |
| C(m1)–C(a2)–C(b2) | 125.6(4)   | C(a8)–C(m4)–C(a1) | 124.7(4) |
| N(2)–C(a3)–C(m1)  | 125.5(4)   | C(b8)–C(4)–C(5)   | 112.3(3) |
| N(2)–C(a3)–C(b3)  | 109.4(3)   | C(6)–C(5)–C(4)    | 115.5(3) |
| C(m1)–C(a3)–C(b3) | 125.1(4)   | O(2)–C(6)–O(1)    | 122.7(4) |
| C(m2)–C(a4)–N(2)  | 125.1(4)   | O(2)–C(6)–C(5)    | 124.5(4) |
| C(m2)–C(a4)–C(b4) | 125.6(4)   | O(1)–C(6)–C(5)    | 112.8(3) |

**Table S5.** Continued

| angle             | degree   | angle            | degree   |
|-------------------|----------|------------------|----------|
| N(2)–C(a4)–C(b4)  | 109.3(4) | C(6)–O(1)–C(7)   | 115.5(3) |
| C(m2)–C(a5)–N(3)  | 124.5(4) | C(b1)–C(8)–C(9)  | 115.8(4) |
| C(m2)–C(a5)–C(b5) | 126.3(4) | C(10)–C(9)–C(8)  | 113.8(4) |
| N(3)–C(a5)–C(b5)  | 109.3(4) | O(4)–C(10)–O(3)  | 122.5(5) |
| C(m3)–C(a6)–N(3)  | 125.4(4) | O(4)–C(10)–C(9)  | 125.7(4) |
| C(m3)–C(a6)–C(b6) | 124.3(4) | O(3)–C(10)–C(9)  | 111.7(4) |
| N(3)–C(a6)–C(b6)  | 110.3(4) | C(10)–O(3)–C(11) | 114.3(5) |
| C(m3)–C(a7)–N(4)  | 125.1(4) |                  |          |

<sup>a</sup>The estimated standard deviations of the least significant digits are given in parentheses.

**Table S6.** Anisotropic Displacement Parameters ( $\text{\AA}^2$ ) for  $[\text{Fe}(\text{deut})(\text{NO})]^a$ 

| atom  | $U_{11}$   | $U_{22}$   | $U_{33}$   | $U_{23}$    | $U_{13}$    | $U_{12}$    |
|-------|------------|------------|------------|-------------|-------------|-------------|
| Fe(1) | 0.0249(3)  | 0.0241(3)  | 0.0205(3)  | -0.0003(2)  | -0.0028(2)  | -0.0149(2)  |
| N(1)  | 0.0196(15) | 0.0247(16) | 0.0226(16) | -0.0031(13) | 0.0044(12)  | -0.0126(13) |
| N(2)  | 0.0333(18) | 0.0307(18) | 0.0218(16) | -0.0025(14) | -0.0022(14) | -0.0206(15) |
| N(3)  | 0.043(2)   | 0.0221(17) | 0.0310(18) | 0.0012(14)  | -0.0155(16) | -0.0189(16) |
| N(4)  | 0.0179(15) | 0.0258(17) | 0.0238(16) | -0.0052(13) | 0.0008(12)  | -0.0114(13) |
| N(5)  | 0.0253(16) | 0.0259(17) | 0.0223(16) | -0.0016(13) | -0.0016(13) | -0.0151(14) |
| O(5)  | 0.0273(15) | 0.0387(16) | 0.0296(15) | -0.0064(12) | -0.0046(12) | -0.0169(13) |
| C(A1) | 0.0177(18) | 0.026(2)   | 0.029(2)   | -0.0056(16) | -0.0013(15) | -0.0094(16) |
| C(A2) | 0.0251(19) | 0.028(2)   | 0.026(2)   | -0.0058(16) | 0.0030(16)  | -0.0163(17) |
| C(A3) | 0.043(2)   | 0.028(2)   | 0.025(2)   | -0.0022(17) | -0.0063(18) | -0.023(2)   |
| C(A4) | 0.049(3)   | 0.033(2)   | 0.0205(19) | -0.0027(16) | -0.0018(17) | -0.031(2)   |
| C(A5) | 0.038(2)   | 0.029(2)   | 0.033(2)   | -0.0042(18) | -0.0089(18) | -0.0192(19) |
| C(A6) | 0.0212(19) | 0.028(2)   | 0.041(2)   | -0.0121(18) | -0.0052(17) | -0.0106(17) |
| C(A7) | 0.0202(19) | 0.029(2)   | 0.032(2)   | -0.0130(17) | 0.0009(16)  | -0.0139(17) |
| C(A8) | 0.025(2)   | 0.025(2)   | 0.0216(18) | -0.0047(15) | 0.0006(15)  | -0.0157(17) |
| C(B1) | 0.0200(19) | 0.031(2)   | 0.041(2)   | -0.0065(18) | -0.0035(17) | -0.0093(17) |
| C(B2) | 0.021(2)   | 0.033(2)   | 0.037(2)   | -0.0122(18) | 0.0068(17)  | -0.0143(18) |
| C(B3) | 0.037(2)   | 0.039(2)   | 0.024(2)   | -0.0105(17) | 0.0077(17)  | -0.028(2)   |
| C(B4) | 0.041(2)   | 0.036(2)   | 0.029(2)   | -0.0021(18) | -0.0071(19) | -0.022(2)   |
| C(B5) | 0.025(2)   | 0.032(2)   | 0.047(3)   | -0.0137(19) | -0.0123(19) | -0.0105(18) |
| C(B6) | 0.025(2)   | 0.034(2)   | 0.040(2)   | -0.0090(19) | -0.0058(18) | -0.0121(18) |
| C(B7) | 0.023(2)   | 0.038(2)   | 0.033(2)   | -0.0176(18) | 0.0089(17)  | -0.0213(19) |
| C(B8) | 0.026(2)   | 0.031(2)   | 0.0223(19) | -0.0070(16) | 0.0042(15)  | -0.0198(18) |
| C(M1) | 0.033(2)   | 0.041(2)   | 0.030(2)   | -0.0170(19) | 0.0131(18)  | -0.027(2)   |
| C(M2) | 0.034(2)   | 0.027(2)   | 0.038(2)   | -0.0017(18) | -0.0179(19) | -0.0126(18) |
| C(M3) | 0.021(2)   | 0.029(2)   | 0.044(2)   | -0.0158(19) | -0.0046(18) | -0.0092(17) |
| C(M4) | 0.0252(19) | 0.0216(19) | 0.0223(19) | 0.0016(15)  | -0.0041(15) | -0.0105(16) |
| C(1)  | 0.029(2)   | 0.044(3)   | 0.035(2)   | -0.001(2)   | -0.0004(18) | -0.017(2)   |
| C(2)  | 0.036(2)   | 0.041(3)   | 0.040(3)   | -0.004(2)   | -0.009(2)   | -0.013(2)   |
| C(3)  | 0.029(2)   | 0.053(3)   | 0.035(2)   | -0.015(2)   | 0.0095(19)  | -0.024(2)   |
| C(4)  | 0.034(2)   | 0.035(2)   | 0.024(2)   | -0.0053(17) | 0.0047(17)  | -0.0239(19) |
| C(5)  | 0.051(3)   | 0.036(2)   | 0.027(2)   | -0.0022(18) | -0.0025(19) | -0.029(2)   |
| C(6)  | 0.033(2)   | 0.031(2)   | 0.035(2)   | -0.0062(18) | -0.0041(18) | -0.0169(19) |
| O(1)  | 0.0375(16) | 0.0317(16) | 0.0365(16) | -0.0023(13) | -0.0108(13) | -0.0178(14) |



**Table S6.** Continued

| atom  | $U_{11}$ | $U_{22}$ | $U_{33}$   | $U_{23}$   | $U_{13}$    | $U_{12}$    |
|-------|----------|----------|------------|------------|-------------|-------------|
| C(7)  | 0.064(3) | 0.034(2) | 0.039(3)   | 0.003(2)   | -0.026(2)   | -0.022(2)   |
| O(2)  | 0.075(2) | 0.052(2) | 0.0449(19) | 0.0116(16) | -0.0223(17) | -0.048(2)   |
| C(8)  | 0.028(2) | 0.042(3) | 0.046(3)   | -0.007(2)  | -0.008(2)   | -0.014(2)   |
| C(9)  | 0.030(2) | 0.043(3) | 0.041(2)   | -0.008(2)  | -0.0039(19) | -0.013(2)   |
| C(10) | 0.036(2) | 0.031(2) | 0.044(3)   | 0.004(2)   | -0.013(2)   | -0.006(2)   |
| O(3)  | 0.046(2) | 0.038(2) | 0.111(3)   | -0.014(2)  | -0.009(2)   | -0.0167(17) |
| C(11) | 0.067(4) | 0.046(4) | 0.153(7)   | -0.003(4)  | -0.006(4)   | -0.032(3)   |
| O(4)  | 0.043(2) | 0.055(2) | 0.0440(19) | 0.0100(17) | -0.0089(16) | -0.0164(18) |
| C(12) | 0.023(2) | 0.039(2) | 0.044(3)   | -0.009(2)  | 0.0066(18)  | -0.0130(19) |

<sup>a</sup>The estimated standard deviations of the least significant digits are given in parentheses. The anisotropic displacement factor exponent takes the form:  $-2 \pi [\text{h}^2 U_{11} + \dots + 2 \text{h k a}^* \text{b}^* U_{12}]$ .

**Table S7.** Hydrogen Atom Coordinates and Equivalent Isotropic Displacement Parameters ( $\text{\AA}^2$ ) for  $[\text{Fe}(\text{deut})(\text{NO})]^a$

| atom   | $x$     | $y$     | $z$    | $U(\text{eq})$ |
|--------|---------|---------|--------|----------------|
| H(B4)  | 0.2847  | 0.2643  | 1.8265 | 0.040          |
| H(B6)  | 0.8702  | 0.1630  | 1.4093 | 0.038          |
| H(M1)  | -0.0147 | 0.6083  | 1.6135 | 0.038          |
| H(M2)  | 0.5217  | 0.1781  | 1.7064 | 0.038          |
| H(M3)  | 0.7823  | 0.3338  | 1.2356 | 0.037          |
| H(M4)  | 0.2422  | 0.7347  | 1.1219 | 0.028          |
| H(1A)  | 0.0284  | 0.3939  | 1.8884 | 0.055          |
| H(1B)  | -0.0481 | 0.4598  | 1.7803 | 0.055          |
| H(1C)  | -0.0012 | 0.5403  | 1.8414 | 0.055          |
| H(2A)  | 0.8813  | 0.0202  | 1.6088 | 0.059          |
| H(2B)  | 0.7481  | -0.0023 | 1.6480 | 0.059          |
| H(2C)  | 0.7694  | 0.1002  | 1.7040 | 0.059          |
| H(3A)  | 0.7370  | 0.5207  | 0.9508 | 0.056          |
| H(3B)  | 0.7971  | 0.3908  | 1.0330 | 0.056          |
| H(3C)  | 0.8043  | 0.5183  | 1.0560 | 0.056          |
| H(4A)  | 0.3818  | 0.7149  | 0.9595 | 0.035          |
| H(4B)  | 0.5341  | 0.6504  | 0.9060 | 0.035          |
| H(5A)  | 0.4136  | 0.8702  | 1.0281 | 0.042          |
| H(5B)  | 0.5701  | 0.7976  | 1.0012 | 0.042          |
| H(7A)  | 0.3897  | 1.0318  | 0.6748 | 0.065          |
| H(7B)  | 0.4027  | 0.9104  | 0.6214 | 0.065          |
| H(7C)  | 0.5322  | 0.9232  | 0.6389 | 0.065          |
| H(8A)  | -0.1136 | 0.8427  | 1.2016 | 0.046          |
| H(8B)  | 0.0250  | 0.8227  | 1.1234 | 0.046          |
| H(9A)  | -0.1377 | 1.0437  | 1.1549 | 0.046          |
| H(9B)  | -0.0845 | 1.0138  | 1.2747 | 0.046          |
| H(11A) | 0.2291  | 1.1190  | 1.1408 | 0.133          |
| H(11B) | 0.1223  | 1.2638  | 1.1322 | 0.133          |
| H(11C) | 0.1546  | 1.1785  | 1.0309 | 0.133          |
| H(12A) | -0.1927 | 0.8912  | 1.4266 | 0.055          |
| H(12B) | -0.1585 | 0.7952  | 1.5412 | 0.055          |
| H(12C) | -0.2058 | 0.7573  | 1.4427 | 0.055          |

<sup>a</sup>  $U(\text{eq})$  is defined as one third of the trace of the orthogonalized  $U_{ij}$  tensor the estimated standard deviations of the least significant digits are given in parentheses.

## Supporting Information

Table S1. Summary of Nitrosyl Geometry in Five- and Six-coordinate Protein Derivatives.

Table S2. Complete Crystallographic Details for [Fe(deut)(NO)].

Table S3. Atomic Coordinates and Equivalent Isotropic Displacement Parameters for [Fe(deut)(NO)].

Table S4. Bond Lengths for [Fe(deut)(NO)].

Table S5. Bond Angles for [Fe(deut)(NO)].

Table S6. Anisotropic Isotropic Displacement Parameters for [Fe(deut)(NO)].

Table S7. Hydrogen Coordinates and Isotropic Displacement Parameters for [Fe(deut)(NO)].
